# Supplementary material for: Senescence-associated hyper-activation to inflammatory stimuli in vitro
Source: PubMed Central journal article supplement (PMC8386536; doi:10.18632/aging.203396), 2021-08-10
Supplement: aging-13-203396-s002.pdf [file aging-13-203396-s002.pdf]

**SUPPLEMENTARY TABLES**

**Supplementary Table 1. Production of inflammatory cytokines and chemokines by non-senescent HUVECs (NC HUVEC) and IR-induced senescent HUVECs (IR HUVEC) 24 hours after incubation with vehicle or stimulated with 30 ng/ml LPS.**

|                 | 1                          | 2                      | 3                          | 4                      | P-Value |        |        |        |
|-----------------|----------------------------|------------------------|----------------------------|------------------------|---------|--------|--------|--------|
|                 | NC HUVEC + vehicle (pg/mL) | NC HUVEC + LPS (pg/mL) | IR HUVEC + vehicle (pg/mL) | IR HUVEC + LPS (pg/mL) | 1 vs 2  | 3 vs 4 | 1 vs 3 | 2 vs 4 |
| sCD40L          | 3.25 ± 0.49                | 5.41 ± 0.93            | 62.67 ± 10.83              | 105.33 ± 7.09          | **      | ***    | ***    | ***    |
| Eotaxin         | 1.55 ± 0.30                | 2.29 ± 0.48            | 32.83 ± 5.65               | 51.61 ± 4.53           | *       | **     | ***    | ***    |
| FLT-3L          | 0.86 ± 0.03                | 0.92 ± 0.06            | 17.30 ± 2.61               | 24.12 ± 3.06           | NS      | *      | ***    | ***    |
| Fractalkine     | 3.96 ± 5.02                | 14.46 ± 2.44           | 226.23 ± 34.29             | 274.62 ± 49.88         | **      | NS     | ***    | ***    |
| G-CSF           | 125.68 ± 1.94              | 998.16 ± 153.67        | 25472.97 ± 4318.10         | 39264.89 ± 5329.63     | ***     | **     | ***    | ***    |
| GM-CSF          | 14.62 ± 0.75               | 108.49 ± 13.78         | 1843.58 ± 291.68           | 5074.77 ± 1423.94      | ***     | **     | ***    | ***    |
| GRO $\alpha$    | 683.37 ± 36.05             | 1689.77 ± 408.61       | 13823.24 ± 1849.17         | 21218.77 ± 4531.09     | **      | *      | ***    | ***    |
| IFN- $\alpha$ 2 | 3.91 ± 0.42                | 4.88 ± 0.46            | 58.55 ± 10.43              | 81.45 ± 16.95          | *       | 0.06   | ***    | ***    |
| IFN $\gamma$    | 0.28 ± 0.03                | 0.44 ± 0.05            | 5.53 ± 0.94                | 8.13 ± 1.46            | **      | *      | ***    | ***    |
| IL1 $\alpha$    | 1.66 ± 0.05                | 3.44 ± 0.16            | 18.74 ± 3.79               | 41.19 ± 9.42           | ***     | **     | ***    | ***    |
| IL1 $\beta$     | 0.82 ± 0.58                | 1.75 ± 0.43            | 27.35 ± 6.40               | 36.50 ± 10.84          | *       | NS     | ***    | ***    |
| IL1RA           | 0.34 ± 0.02                | 0.56 ± 0.03            | 6.51 ± 1.24                | 9.07 ± 0.99            | ***     | *      | ***    | ***    |
| IL2             | 0.04 ± 0.04                | 0.17 ± 0.02            | 2.48 ± 0.52                | 2.77 ± 0.37            | ***     | NS     | ***    | ***    |
| IL3             | 0.03 ± 0.05                | 0.01 ± 0.01            | 0.64 ± 0.71                | 1.58 ± 0.60            | NS      | NS     | NS     | **     |
| IL4             | 0.11 ± 0.02                | 0.18 ± 0.01            | 1.68 ± 0.15                | 2.23 ± 0.36            | ***     | *      | ***    | ***    |
| IL5             | 0.04 ± 0.01                | 0.05 ± 0.01            | 0.65 ± 0.08                | 0.98 ± 0.21            | NS      | *      | ***    | ***    |
| IL6             | 620.70 ± 111.76            | 3370.38 ± 531.38       | 36667.56 ± 5926.87         | 54897.55 ± 10508.26    | ***     | *      | ***    | ***    |
| IL8             | 655.64 ± 99.89             | 2491.95 ± 412.60       | 52105.49 ± 1449.75         | 74359.67 ± 21676.26    | ***     | 0.08   | ***    | ***    |
| IL9             | 1.29 ± 0.07                | 2.08 ± 0.05            | 23.26 ± 2.66               | 31.64 ± 3.07           | ***     | **     | ***    | ***    |
| IL10            | 0.36 ± 0.03                | 0.74 ± 0.09            | 8.92 ± 1.30                | 13.44 ± 1.22           | ***     | **     | ***    | ***    |
| IL12p40         | 3.45 ± 0.47                | 5.61 ± 0.42            | 64.81 ± 1.01               | 94.14 ± 12.44          | ***     | **     | ***    | ***    |
| IL12p70         | 0.02 ± 0.04                | 0.18 ± 0.17            | 1.09 ± 0.75                | 1.47 ± 1.29            | NS      | NS     | *      | 0.09   |
| IL13            | 1.64 ± 1.00                | 2.48 ± 0.64            | 35.57 ± 7.20               | 41.18 ± 11.60          | NS      | NS     | ***    | ***    |
| IL15            | 2.35 ± 0.20                | 3.23 ± 0.12            | 70.19 ± 9.16               | 114.07 ± 20.15         | ***     | **     | ***    | ***    |
| IL17A           | 0.14 ± 0.08                | 0.63 ± 0.12            | 7.95 ± 0.38                | 8.55 ± 1.74            | ***     | NS     | ***    | ***    |
| IL17E/IL25      | 3.18 ± 0.64                | 7.55 ± 0.45            | 116.91 ± 14.03             | 169.48 ± 20.66         | ***     | **     | ***    | ***    |
| IL17F           | 0.47 ± 0.38                | 1.16 ± 0.23            | 22.10 ± 2.85               | 26.54 ± 4.69           | *       | NS     | ***    | ***    |
| IL18            | 0.11 ± 0.03                | 0.19 ± 0.02            | 1.94 ± 0.25                | 2.98 ± 0.32            | **      | **     | ***    | ***    |
| IL22            | 0.00 ± 0.00                | 18.17 ± 1.17           | 265.59 ± 50.25             | 400.75 ± 33.91         | ***     | **     | ***    | ***    |
| IL27            | 12.96 ± 8.76               | 14.82 ± 3.10           | 356.25 ± 46.48             | 394.11 ± 63.50         | NS      | NS     | ***    | ***    |
| IP10            | 23.06 ± 3.51               | 136.26 ± 14.19         | 29473.26 ± 14267.88        | 29360.89 ± 11899.07    | ***     | NS     | **     | **     |
| MCP3            | 22.41 ± 0.64               | 72.38 ± 9.53           | 186.56 ± 27.39             | 305.38 ± 54.25         | ***     | **     | ***    | ***    |
| MCSF            | 34.67 ± 0.93               | 48.74 ± 2.95           | 615.57 ± 89.70             | 1044.27 ± 166.75       | ***     | **     | ***    | ***    |
| MDC             | 0.01 ± 0.01                | 0.05 ± 0.02            | 0.73 ± 0.23                | 1.07 ± 0.26            | *       | 0.08   | ***    | ***    |
| MIG/CXCL9       | 2.70 ± 0.24                | 6.25 ± 0.57            | 252.02 ± 55.18             | 378.85 ± 75.79         | ***     | *      | ***    | ***    |
| MIP-1 $\beta$   | 0.00 ± 0.00                | 0.00 ± 0.00            | 26.05 ± 7.52               | 30.06 ± 6.11           | NS      | NS     | ***    | ***    |
| PDGF-AA         | 430.88 ± 14.86             | 440.39 ± 58.44         | 754 ± 114.06               | 1142.28 ± 254.60       | NS      | *      | ***    | ***    |
| PDGF-AB/BB      | 645.98 ± 11.48             | 758.43 ± 86.22         | 4730.46 ± 718.48           | 9212.95 ± 1718.97      | *       | **     | ***    | ***    |
| RANTES          | 13.45 ± 1.88               | 21.75 ± 1.33           | 9275.92 ± 2226.48          | 17334.21 ± 16977.73    | ***     | NS     | ***    | 0.08   |
| TGF $\alpha$    | 0.83 ± 0.09                | 1.32 ± 0.23            | 130.71 ± 25.25             | 223.88 ± 45.16         | **      | *      | ***    | ***    |
| TNF $\alpha$    | 3.39 ± 0.21                | 5.68 ± 0.48            | 130.71 ± 25.25             | 223.88 ± 45.16         | **      | *      | ***    | ***    |
| TNF $\beta$     | 1.88 ± 0.15                | 3.54 ± 0.27            | 49.75 ± 3.38               | 69.75 ± 11.17          | ***     | *      | ***    | ***    |
| Eotaxin-2       | 0.27 ± 0.11                | 0.65 ± 0.15            | 2.67 ± 1.45                | 4.78 ± 2.80            | **      | NS     | *      | *      |
| MCP-2           | 3.98 ± 0.41                | 6.13 ± 0.58            | 2025.50 ± 320.31           | 4026.44 ± 427.57       | ***     | ***    | ***    | ***    |
| BCA-1           | 0.31 ± 0.03                | 0.30 ± 0.04            | 2.98 ± 0.86                | 3.65 ± 0.71            | NS      | NS     | ***    | ***    |
| I-309           | 0.42 ± 0.02                | 1.10 ± 0.11            | 2.19 ± 0.35                | 2.73 ± 0.49            | ***     | NS     | ***    | ***    |
| IL16            | 2.18 ± 0.70                | 2.20 ± 1.60            | 12.70 ± 21.47              | 22.57 ± 22.25          | NS      | NS     | NS     | NS     |
| TARC            | 0.05 ± 0.04                | 0.07 ± 0.04            | 0.66 ± 0.61                | 0.91 ± 0.54            | NS      | NS     | 0.09   | *      |

|          |               |                |                  |                    |      |      |     |     |
|----------|---------------|----------------|------------------|--------------------|------|------|-----|-----|
| SCF      | 1.07 ± 0.35   | 1.19 ± 0.18    | 55.23 ± 10.57    | 113.49 ± 16.47     | NS   | **   | *** | *** |
| IL33     | 1.67 ± 0.28   | 1.61 ± 0.50    | 15.92 ± 6.71     | 16.80 ± 4.49       | NS   | NS   | **  | *** |
| IL21     | 0.74 ± 0.31   | 0.66 ± 0.16    | 7.62 ± 1.68      | 8.50 ± 3.16        | NS   | NS   | *** | **  |
| IL23     | 20.58 ± 15.29 | 13.03 ± 6.14   | 182.15 ± 70.78   | 66.92 ± 65.34      | NS   | 0.05 | **  | NS  |
| TRAIL    | 2.42 ± 0.15   | 2.93 ± 0.41    | 71.80 ± 17.18    | 85.64 ± 10.35      | 0.06 | NS   | *** | *** |
| SDF-1α+β | 0.00 ± 0.00   | 19.83 ± 24.89  | 232.60 ± 280.75  | 430.73 ± 290.46    | NS   | NS   | NS  | *   |
| ENA-78   | 55.09 ± 5.29  | 407.35 ± 43.44 | 9255.07 ± 158.57 | 17449.80 ± 3021.68 | ***  | **   | *** | *** |

(n = 4; mean ± SD; \* p<0.05 \*\* p<0.01 \*\*\* p<0.001).

**Supplementary Table 2. List of primers used for qPCR.**

| Gene          | Forward primer          | Reverse primer          |
|---------------|-------------------------|-------------------------|
| <i>GAPDH</i>  | GTCTCCTCTGACTTCAACAGCG  | ACCACCCTGTTGCTGTAGCCAA  |
| <i>IL6</i>    | AGACAGCCACTCACCTCTTCAG  | TTCTGCCAGTGCCTCTTTGCTG  |
| <i>IL1β</i>   | CCACAGACCTTCCAGGAGAATG  | GTGCAGTTCAGTGATCGTACAGG |
| <i>TNFα</i>   | CTCTTCTGCCTGCTGCACTTTG  | ATGGGCTACAGGCTTGCTCACTC |
| <i>CCL2</i>   | GTCTCTGCCGCCCTTCTGT     | TTGCATCTGGCTGAGCGAG     |
| <i>CCL5</i>   | CCTGCTGCTTTGCCACATTGC   | ACACACTTGGCGGTTCTTTCCGG |
| <i>CXCL1</i>  | AGGGAATTCACCCCAAGAAC    | ACTATGGGGGATGCAGGATT    |
| <i>CXCL10</i> | GGTGAGAAGAGATGTCTGAATCC | GTCCATCCTTGAAGCACTGCA   |
| <i>p16</i>    | CTCGTGCTGATGCTACTGAGGA  | GGTCGGCGCAGTTGGGCTCC    |
| <i>p21</i>    | AGGTGGACCTGGAGACTCTCAG  | TCCTCTTGGAGAAGATCAGCCG  |

**Supplementary Table 3. List of antibodies used for western-blot.**

| Protein                      | Dilution          | Vendor                                          | Cat. #    |
|------------------------------|-------------------|-------------------------------------------------|-----------|
| β-Actin                      | 1:1000 in 5% milk | Cell Signaling Technologies, Danvers, MA, USA   | 4970S     |
| GAPDH                        | 1:1000 in 5% milk | Cell Signaling Technologies, Danvers, MA, USA   | 97166S    |
| p-p38 MAPK                   | 1:1000 in 5% milk | Cell Signaling Technologies, Danvers, MA, USA   | 4511S     |
| p38 MAPK                     | 1:1000 in 5% milk | Cell Signaling Technologies, Danvers, MA, USA   | 8690S     |
| NF-κB p65                    | 1:1000 in 5% milk | BD Biosciences, San Jose, CA, USA               | 610869    |
| TLR4                         | 1:200 in 5% milk  | Santa Cruz Biotechnology, Inc., Dallas, TX, USA | sc-293072 |
| IL1R1                        | 1:200 in 5% milk  | Santa Cruz Biotechnology, Inc., Dallas, TX, USA | sc-393998 |
| IL1R2                        | 1:200 in 5% milk  | Santa Cruz Biotechnology, Inc., Dallas, TX, USA | sc-376247 |
| TNFR1                        | 1:200 in 5% milk  | Santa Cruz Biotechnology, Inc., Dallas, TX, USA | sc-8436   |
| Histone H3                   | 1:1000 in 5% milk | Cell Signaling Technologies, Danvers, MA, USA   | 4499S     |
| Anti-Mouse IgG (HRP-Linked)  | 1:3000 in 5% milk | Cell Signaling Technologies, Danvers, MA, USA   | 7076S     |
| Anti-Rabbit IgG (HRP-Linked) | 1:3000 in 5% milk | Cell Signaling Technologies, Danvers, MA, USA   | 7074S     |
